# Supplementary material
Source: PubMed Central journal article supplement (PMC2782039)
Supplement: supp_M109.022624_jbc.M109.022624-1.pdf [file supp_M109.022624_jbc.M109.022624-1.pdf]

## **Supplementary Online Material for**

### **The Structure of the *Staphylococcus aureus* Sortase-Substrate Complex Reveals how the Universally Conserved LPXTG Sorting Signal is Recognized**

Nuttee Suree, Chu Kong Liew, Valerie A. Villareal, William Thieu, Evgeny A. Fadeev, Jeremy J. Clemens, Michael E. Jung, and Robert T. Clubb

#### **This PDF file includes:**

Figures S1  
Tables S1

## Supplementary Online Material

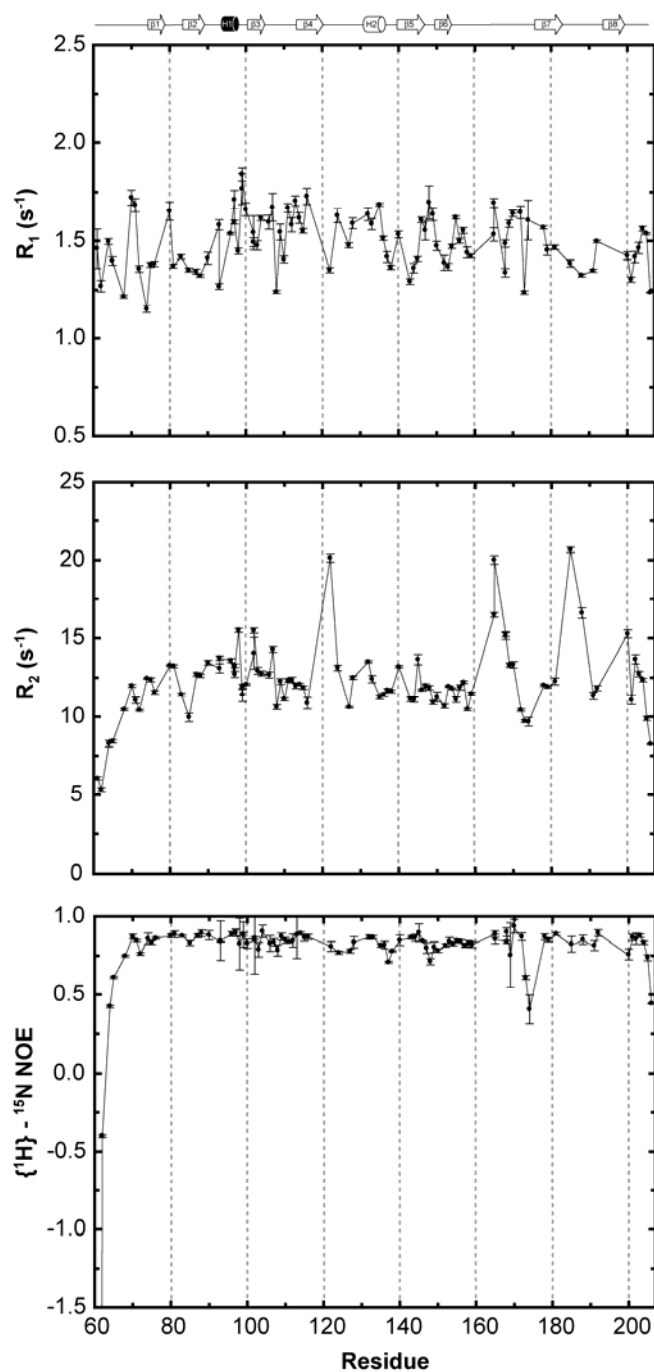

**Fig. S1:** Backbone amide  $^{15}\text{N}$  spin relaxation data. The connecting lines represent only the trends of the data and are not necessarily representing residues with no data available (due to low signal or overlapped resonance).

## Supplementary Online Material

**Table S1:** Model-free parameters for the SrtA-LPAT\* complex

| Residue |           | Model | $S^2$                | $S_f^2$              | $\tau_e$ (ps)    | $R_{ex}$ ( $s^{-1}$ ) |
|---------|-----------|-------|----------------------|----------------------|------------------|-----------------------|
| A61     |           | 1     | 0.496 ( $\pm$ 0.009) |                      |                  |                       |
| K62     |           | 5     | 0.350 ( $\pm$ 0.011) | 0.849 ( $\pm$ 0.015) | 570 ( $\pm$ 17)  |                       |
| Q64     |           | 5     | 0.628 ( $\pm$ 0.019) | 0.898 ( $\pm$ 0.011) | 923 ( $\pm$ 47)  |                       |
| I65     |           | 5     | 0.652 ( $\pm$ 0.011) | 0.825 ( $\pm$ 0.008) | 1217 ( $\pm$ 66) |                       |
| D68     |           | 4     | 0.760 ( $\pm$ 0.005) |                      | 15 ( $\pm$ 1)    |                       |
| S70     |           | 1     | 0.981 ( $\pm$ 0.007) |                      |                  |                       |
| K71     |           | 1     | 0.928 ( $\pm$ 0.013) |                      |                  |                       |
| V72     |           | 1     | 0.831 ( $\pm$ 0.004) |                      |                  |                       |
| G74     | $\beta$ 1 | 3     | 0.740 ( $\pm$ 0.011) |                      |                  | 3.3 ( $\pm$ 0.2)      |
| Y75     | $\beta$ 1 | 3     | 0.884 ( $\pm$ 0.008) |                      |                  | 1.4 ( $\pm$ 0.2)      |
| I76     | $\beta$ 1 | 1     | 0.912 ( $\pm$ 0.006) |                      |                  |                       |
| D80     |           | 1     | 1.000 ( $\pm$ 0.002) |                      |                  |                       |
| I83     | $\beta$ 2 | 1     | 0.916 ( $\pm$ 0.005) |                      |                  |                       |
| E85     | $\beta$ 2 | 1     | 0.869 ( $\pm$ 0.006) |                      |                  |                       |
| G90     |           | 1     | 1.000 ( $\pm$ 0.006) |                      |                  |                       |
| T93     | H1        | 1     | 1.000 ( $\pm$ 0.008) |                      |                  |                       |
| Q96     | H1        | 1     | 1.000 ( $\pm$ 0.002) |                      |                  |                       |
| L97     | H1        | 1     | 1.000 ( $\pm$ 0.008) |                      |                  |                       |
| N98     | H1        | 3     | 0.961 ( $\pm$ 0.010) |                      |                  | 3.2 ( $\pm$ 0.2)      |
| G100    |           | 1     | 0.930 ( $\pm$ 0.004) |                      |                  |                       |
| F103    | $\beta$ 3 | 3     | 0.936 ( $\pm$ 0.015) |                      |                  | 1.5 ( $\pm$ 0.3)      |
| A104    | $\beta$ 3 | 1     | 1.000 ( $\pm$ 0.004) |                      |                  |                       |
| E106    |           | 1     | 1.000 ( $\pm$ 0.008) |                      |                  |                       |
| N107    |           | 3     | 1.000 ( $\pm$ 0.026) |                      |                  | 2.1 ( $\pm$ 0.4)      |
| E108    |           | 3     | 0.807 ( $\pm$ 0.005) |                      |                  | 0.5 ( $\pm$ 0.2)      |
| S109    |           | 1     | 0.997 ( $\pm$ 0.008) |                      |                  |                       |
| L110    |           | 1     | 0.904 ( $\pm$ 0.006) |                      |                  |                       |
| D111    |           | 1     | 1.000 ( $\pm$ 0.004) |                      |                  |                       |
| D112    |           | 1     | 1.000 ( $\pm$ 0.007) |                      |                  |                       |
| Q113    | $\beta$ 4 | 1     | 0.997 ( $\pm$ 0.007) |                      |                  |                       |
| N114    | $\beta$ 4 | 1     | 0.936 ( $\pm$ 0.005) |                      |                  |                       |
| I115    | $\beta$ 4 | 1     | 0.980 ( $\pm$ 0.006) |                      |                  |                       |
| S116    | $\beta$ 4 | 1     | 1.000 ( $\pm$ 0.011) |                      |                  |                       |
| F122    |           | 3     | 0.867 ( $\pm$ 0.009) |                      |                  | 9.4 ( $\pm$ 0.3)      |
| D124    |           | 1     | 1.000 ( $\pm$ 0.007) |                      |                  |                       |
| N127    |           | 1     | 0.876 ( $\pm$ 0.004) |                      |                  |                       |
| Y128    |           | 1     | 1.000 ( $\pm$ 0.005) |                      |                  |                       |
| L133    | H2        | 1     | 1.000 ( $\pm$ 0.009) |                      |                  |                       |
| A136    | H2        | 1     | 0.951 ( $\pm$ 0.005) |                      |                  |                       |
| K138    |           | 1     | 0.907 ( $\pm$ 0.005) |                      |                  |                       |
| S140    | $\beta$ 5 | 3     | 0.981 ( $\pm$ 0.011) |                      |                  | 1.1 ( $\pm$ 0.2)      |
| Y143    | $\beta$ 5 | 1     | 0.856 ( $\pm$ 0.007) |                      |                  |                       |
| F144    | $\beta$ 5 | 1     | 0.888 ( $\pm$ 0.011) |                      |                  |                       |
| K145    | $\beta$ 5 | 3     | 0.904 ( $\pm$ 0.008) |                      |                  | 2.5 ( $\pm$ 0.3)      |
| V146    | $\beta$ 5 | 1     | 0.970 ( $\pm$ 0.005) |                      |                  |                       |
| G147    |           | 1     | 0.974 ( $\pm$ 0.009) |                      |                  |                       |
| N148    |           | 1     | 0.925 ( $\pm$ 0.011) |                      |                  |                       |
| E149    | $\beta$ 6 | 1     | 0.898 ( $\pm$ 0.010) |                      |                  |                       |

## Supplementary Online Material

| Residue |           | Model | $S^2$                 | $S_f^2$               | $\tau_e$ (ps)      | $R_{ex}$ ( $s^{-1}$ ) |
|---------|-----------|-------|-----------------------|-----------------------|--------------------|-----------------------|
| T150    | $\beta 6$ | 2     | 0.926 ( $\pm 0.013$ ) |                       | 31 ( $\pm 12$ )    |                       |
| K152    | $\beta 6$ | 1     | 0.848 ( $\pm 0.009$ ) |                       |                    |                       |
| Y153    | $\beta 6$ | 3     | 0.877 ( $\pm 0.010$ ) |                       |                    | 1.1 ( $\pm 0.1$ )     |
| K154    | $\beta 6$ | 1     | 0.935 ( $\pm 0.004$ ) |                       |                    |                       |
| T156    |           | 1     | 0.962 ( $\pm 0.007$ ) |                       |                    |                       |
| S157    |           | 1     | 0.989 ( $\pm 0.006$ ) |                       |                    |                       |
| I158    |           | 1     | 0.851 ( $\pm 0.006$ ) |                       |                    |                       |
| R159    |           | 1     | 0.922 ( $\pm 0.005$ ) |                       |                    |                       |
| V168    |           | 3     | 0.866 ( $\pm 0.014$ ) |                       |                    | 4.4 ( $\pm 0.2$ )     |
| L169    |           | 1     | 1.000 ( $\pm 0.005$ ) |                       |                    |                       |
| D170    |           | 1     | 1.000 ( $\pm 0.005$ ) |                       |                    |                       |
| Q172    |           | 1     | 0.839 ( $\pm 0.006$ ) |                       |                    |                       |
| K173    |           | 5     | 0.750 ( $\pm 0.008$ ) | 0.826 ( $\pm 0.008$ ) | 471 ( $\pm 97$ )   |                       |
| G174    |           | 2     | 0.780 ( $\pm 0.023$ ) |                       | 400 ( $\pm 101$ )  |                       |
| Q178    | $\beta 7$ | 1     | 0.990 ( $\pm 0.004$ ) |                       |                    |                       |
| L179    | $\beta 7$ | 1     | 0.947 ( $\pm 0.005$ ) |                       |                    |                       |
| L181    | $\beta 7$ | 1     | 0.940 ( $\pm 0.007$ ) |                       |                    |                       |
| D185    |           | 3     | 0.880 ( $\pm 0.011$ ) |                       |                    | 9.9 ( $\pm 0.2$ )     |
| N188    |           | 3     | 0.851 ( $\pm 0.005$ ) |                       |                    | 6.1 ( $\pm 0.3$ )     |
| T191    |           | 1     | 0.893 ( $\pm 0.005$ ) |                       |                    |                       |
| G192    |           | 1     | 0.952 ( $\pm 0.004$ ) |                       |                    |                       |
| F200    | $\beta 8$ | 3     | 0.915 ( $\pm 0.013$ ) |                       |                    | 3.9 ( $\pm 0.3$ )     |
| V201    | $\beta 8$ | 1     | 0.835 ( $\pm 0.008$ ) |                       |                    |                       |
| A202    |           | 3     | 0.924 ( $\pm 0.019$ ) |                       |                    | 2.1 ( $\pm 0.4$ )     |
| T203    |           | 1     | 0.997 ( $\pm 0.007$ ) |                       |                    |                       |
| E204    |           | 1     | 1.000 ( $\pm 0.004$ ) |                       |                    |                       |
| V205    |           | 5     | 0.752 ( $\pm 0.013$ ) | 0.894 ( $\pm 0.009$ ) | 2106 ( $\pm 565$ ) |                       |
| K206    |           | 5     | 0.595 ( $\pm 0.004$ ) | 0.795 ( $\pm 0.002$ ) | 848 ( $\pm 12$ )   |                       |

**Note:** For model 5:  $S^2 = S_f^2 S_s^2$ , and  $\tau_e = \tau_s$ . For models 1 to 4  $\tau_e = \tau_f$ .
